# Supplementary material
Source: PubMed Central journal article supplement (PMC8351618)
Supplement: NIHMS1717056-supplement-1.pdf [file NIHMS1717056-supplement-1.pdf]

**Table S1. Sample Characteristics**

|                                                      | N           | %    |
|------------------------------------------------------|-------------|------|
| <b>Lifetime Drug Use (Follow-Up)</b>                 |             |      |
| Alcohol                                              | 1,998       | 64.8 |
| Cigarettes                                           | 891         | 28.9 |
| E-cigarettes                                         | 1,415       | 45.9 |
| Cigars                                               | 518         | 16.8 |
| Marijuana                                            | 1,541       | 50.0 |
| Stimulants                                           | 604         | 19.6 |
| Opioids                                              | 626         | 20.3 |
| Total number of substances used,<br>mean (std. err.) | 5.4 (0.1)   |      |
| <b>Parental Monitoring, mean (std. err.)</b>         | 3.1 (0.01)  |      |
| <b>Sex</b>                                           |             |      |
| Female                                               | 1,687       | 54.7 |
| Male                                                 | 1,395       | 45.3 |
| <b>Race/Ethnicity</b>                                |             |      |
| Hispanic                                             | 1,408       | 45.7 |
| Asian                                                | 513         | 16.7 |
| White                                                | 466         | 15.1 |
| Black                                                | 149         | 4.8  |
| Other                                                | 312         | 10.1 |
| Multi                                                | 164         | 5.3  |
| Missing                                              | 70          | 2.3  |
| <b>Age (baseline), mean (std. err.)</b>              | 15.5 (0.01) |      |
| <b>Age (follow-up), mean (std. err.)</b>             | 17.9 (0.01) |      |
| <b>Parental Education</b>                            |             |      |
| Less than HS                                         | 745         | 24.2 |
| HS                                                   | 957         | 31.1 |
| College                                              | 862         | 28.0 |
| Advanced Degree                                      | 518         | 16.8 |
